# Supplementary material
Source: Springer Nature journal article supplement (https://www.springermedizin.de/resource/supplementary/13033_2013_150_MOESM2_ESM.pdf/9651936)
Supplement: MOESM2 [file 9651936]

| Quality assessment                                                                                |                   |                         |                          |                         |                             |                      | No of patients |                | Effect                  |                                                | Quality | Importance |
|---------------------------------------------------------------------------------------------------|-------------------|-------------------------|--------------------------|-------------------------|-----------------------------|----------------------|----------------|----------------|-------------------------|------------------------------------------------|---------|------------|
| No of studies                                                                                     | Design            | Risk of bias            | Inconsistency            | Indirectness            | Imprecision                 | Other considerations | Haloperidol    | Chlorpromazine | Relative (95% CI)       | Absolute                                       |         |            |
| <b>Global state: No clinically significant improvement - as defined by the individual studies</b> |                   |                         |                          |                         |                             |                      |                |                |                         |                                                |         |            |
| 4 <sup>1</sup>                                                                                    | randomised trials | no serious risk of bias | serious <sup>2</sup>     | no serious indirectness | serious <sup>3</sup>        | none                 | 30/89 (33.7%)  | 33/70 (47.1%)  | RR 0.65 (0.36 to 1.19)  | 165 fewer per 1000 (from 302 fewer to 90 more) | ⊕⊕⊕ LOW | CRITICAL   |
| <b>Leaving the study early</b>                                                                    |                   |                         |                          |                         |                             |                      |                |                |                         |                                                |         |            |
| 2 <sup>4</sup>                                                                                    | randomised trials | no serious risk of bias | no serious inconsistency | no serious indirectness | very serious <sup>5</sup>   | none                 | 2/109 (1.8%)   | 2/84 (2.4%)    | RR 0.66 (0.1 to 4.18)   | 8 fewer per 1000 (from 21 fewer to 76 more)    | ⊕⊕⊕ LOW | CRITICAL   |
| <b>Hypothension</b>                                                                               |                   |                         |                          |                         |                             |                      |                |                |                         |                                                |         |            |
| 3 <sup>6</sup>                                                                                    | randomised trials | no serious risk of bias | no serious inconsistency | no serious indirectness | very serious <sup>3</sup>   | none                 | 4/64 (6.3%)    | 8/45 (17.8%)   | RR 0.37 (0.1 to 1.41)   | 112 fewer per 1000 (from 160 fewer to 73 more) | ⊕⊕⊕ LOW | IMPORTANT  |
| <b>Extrapyramidal symptoms</b>                                                                    |                   |                         |                          |                         |                             |                      |                |                |                         |                                                |         |            |
| 3 <sup>7</sup>                                                                                    | randomised trials | no serious risk of bias | no serious inconsistency | no serious indirectness | very serious <sup>3,8</sup> | none                 | 12/64 (18.8%)  | 2/45 (4.4%)    | RR 3.49 (0.84 to 14.44) | 111 more per 1000 (from 7 fewer to 597 more)   | ⊕⊕⊕ LOW | IMPORTANT  |

<sup>1</sup> From Analysis 2.2 of Leucht 2007. Haloperidol dosages: 5mg (2 studies); 1-5mg (1 study); 5-30mg (1 study). Chlorpromazine dosages: 25mg (1 study); 50mg (2 studies); 25-300mg (1 study).

<sup>2</sup> Visual inspection of forest plot suggests some heterogeneity. I-squared=58%

<sup>3</sup> Less than 200 patients included in the analysis, and CI ranges from substantial benefit with haloperidol to no benefit at all.

<sup>4</sup> From Analysis 2.1 of Leucht 2007

<sup>5</sup> Less than 200 patients included in the analysis, and CI ranges from substantial benefit with haloperidol to substantial benefit with chlorpromazine.

<sup>6</sup> From Analysis 2.4 of Leucht 2007

<sup>7</sup> From Analysis 2.6 of Leucht 2007

<sup>8</sup> Less than 200 patients included in the analysis, and CI ranges from substantial benefit with chlorpromazine to no benefit at all.
